# Supplementary material for: Water-soluble acacetin prodrug confers significant cardioprotection against ischemia/reperfusion injury
Source: PubMed Central journal article supplement (PMC5098248; doi:10.1038/srep36435), 2016-11-07
Supplement: srep36435-s1.pdf [file srep36435-s1.pdf]

## Water-soluble acacetin prodrug confers significant cardioprotection against ischemia/reperfusion injury

Hui Liu, Lei Yang, Hui-Jun Wu, Kui-Hao Chen, Feng Lin, Gang Li, Hai-Ying Sun, Guo-Sheng Xiao, Yan Wang, Gui-Rong Li

### Supplemental material

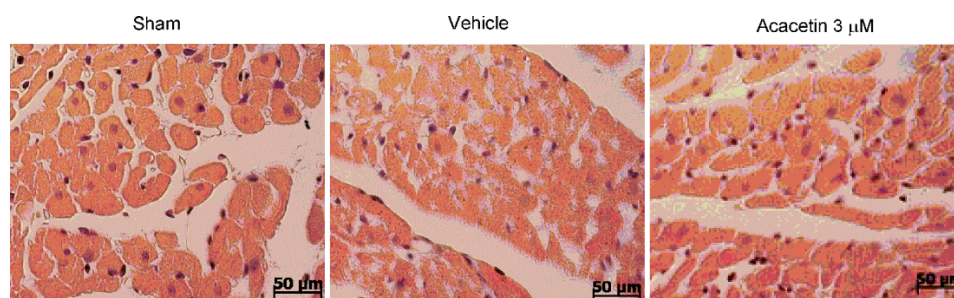

**Figure S1.** HE staining of ventricular slices from *ex vivo* rat hearts.

**Sham:** Sham rat heart tissue without ischemia/reperfusion.

**Vehicle:** Vehicle-treated rat heart tissue with ischemia/reperfusion.

**Acacetin 3  $\mu$ M:** Rat heart treated using 3  $\mu$ M acacetin with ischemia/reperfusion.

Significant histological alteration was observed in vehicle-treated heart. Tissue damage was clearly attenuated in acacetin-treated heart.

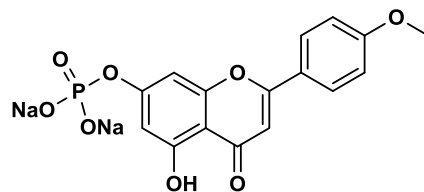

**Figure S2.** Structure of prodrug

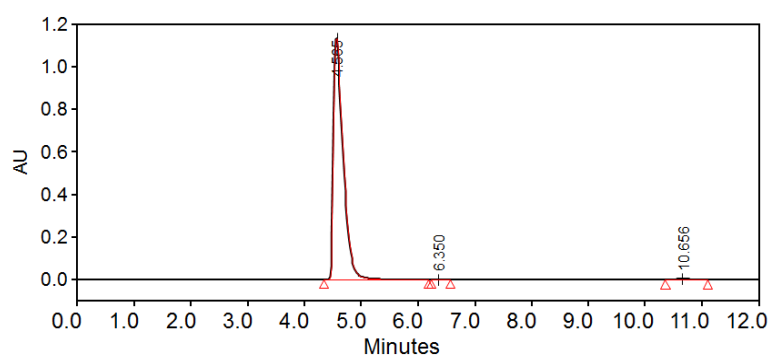

UV HPLC 1 result

| Peak # | Retention Time | % Area |
|--------|----------------|--------|
| 1      | 4.57           | 99.04  |
| 2      | 6.35           | 0.05   |
| 3      | 10.66          | 0.91   |
| Totals |                | 100.00 |

**Figure S3.** HPLC graph of prodrug showing the purity of 99.04%.
